# Supplementary material
Source: Research Square preprint supplement (doi:10.21203/rs.3.rs-9305922/v1)
Supplement: Supplementary file 1 [file 0de9842106a1ba381114e81d.docx]

| **Continent** | **Country** | **n** |
| --- | --- | --- |
| *North America 20 (33.3%)* | United States | 17 |
|  | Canada | 3 |
| *South America 6 (10%)* | Argentina | 3 |
|  | Brazil | 2 |
|  | Colombia | 1 |
| *Europe 16 (26.7%)* | United Kingdom | 4 |
|  | Germany | 3 |
|  | Italy | 2 |
|  | Greece | 2 |
|  | France | 2 |
|  | Austria | 1 |
|  | Switzerland | 1 |
|  | Denmark | 1 |
| *Asia 15 (25%)* | India | 6 |
|  | Japan | 4 |
|  | Israel | 2 |
|  | Saudi Arabia | 1 |
|  | Singapore | 1 |
|  | Thailand | 1 |
| *Oceania 2 (3.3%)* | Australia | 2 |
| *Africa 1 (1.7%)* | Egypt | 1 |

**Supplementary Table 1.** Geographic distribution of respondents by country and continent. Percentages are reported at the continent level and calculated over a total of 60 respondents.
